# Supplementary material for: Upregulated SOX9 expression indicates worse prognosis in solid tumors: a systematic review and meta-analysis
Source: PubMed Central journal article supplement (PMC5762580; doi:10.18632/oncotarget.22635), 2017-11-06
Supplement: oncotarget-08-113163-s001.pdf [file oncotarget-08-113163-s001.pdf]

# Upregulated SOX9 expression indicates worse prognosis in solid tumors: a systematic review and meta-analysis

## SUPPLEMENTARY MATERIALS

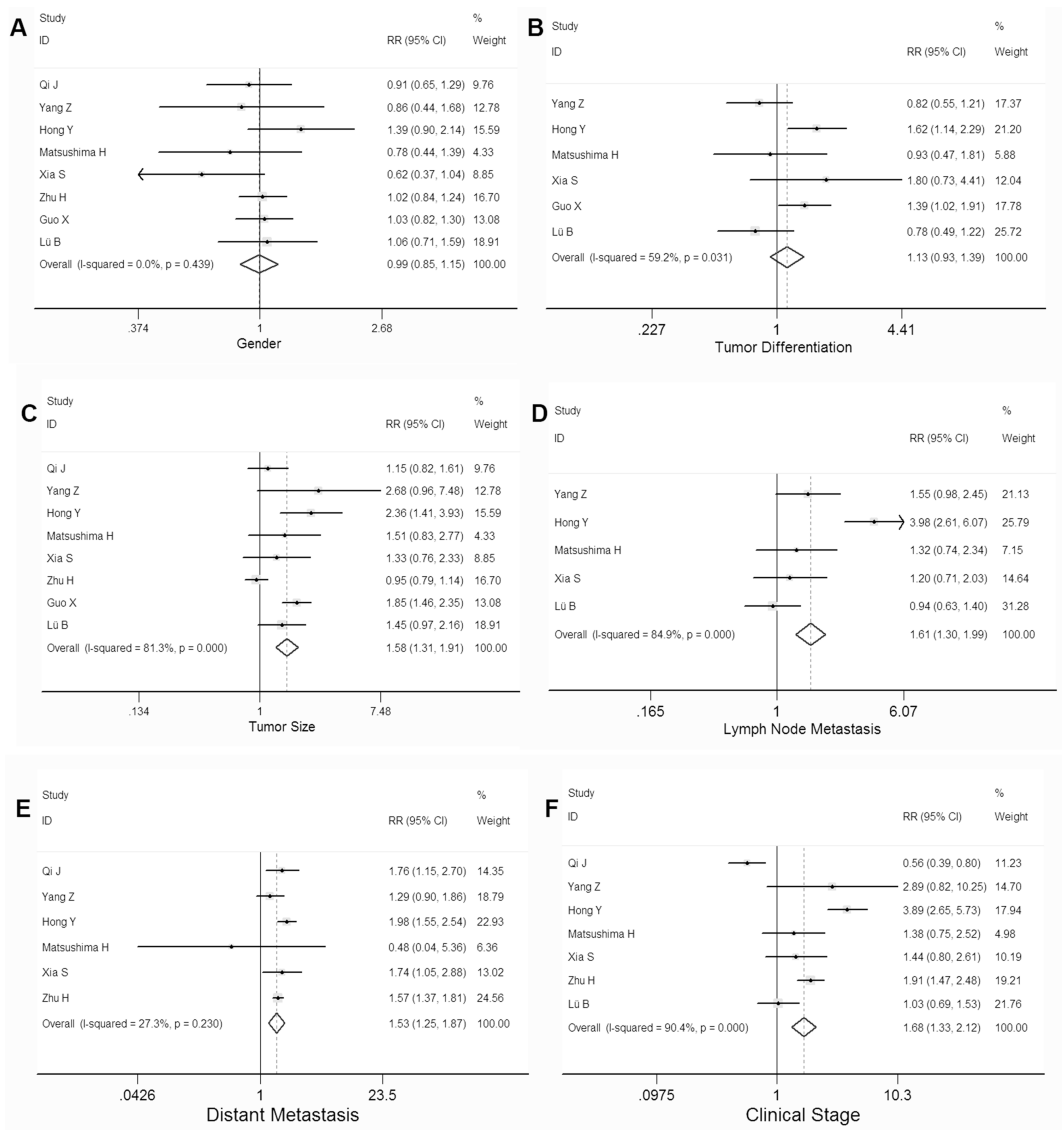

Supplementary Figure 1: Forest plot describing the association between over-expressed SOX9 and clinicopathological parameters.

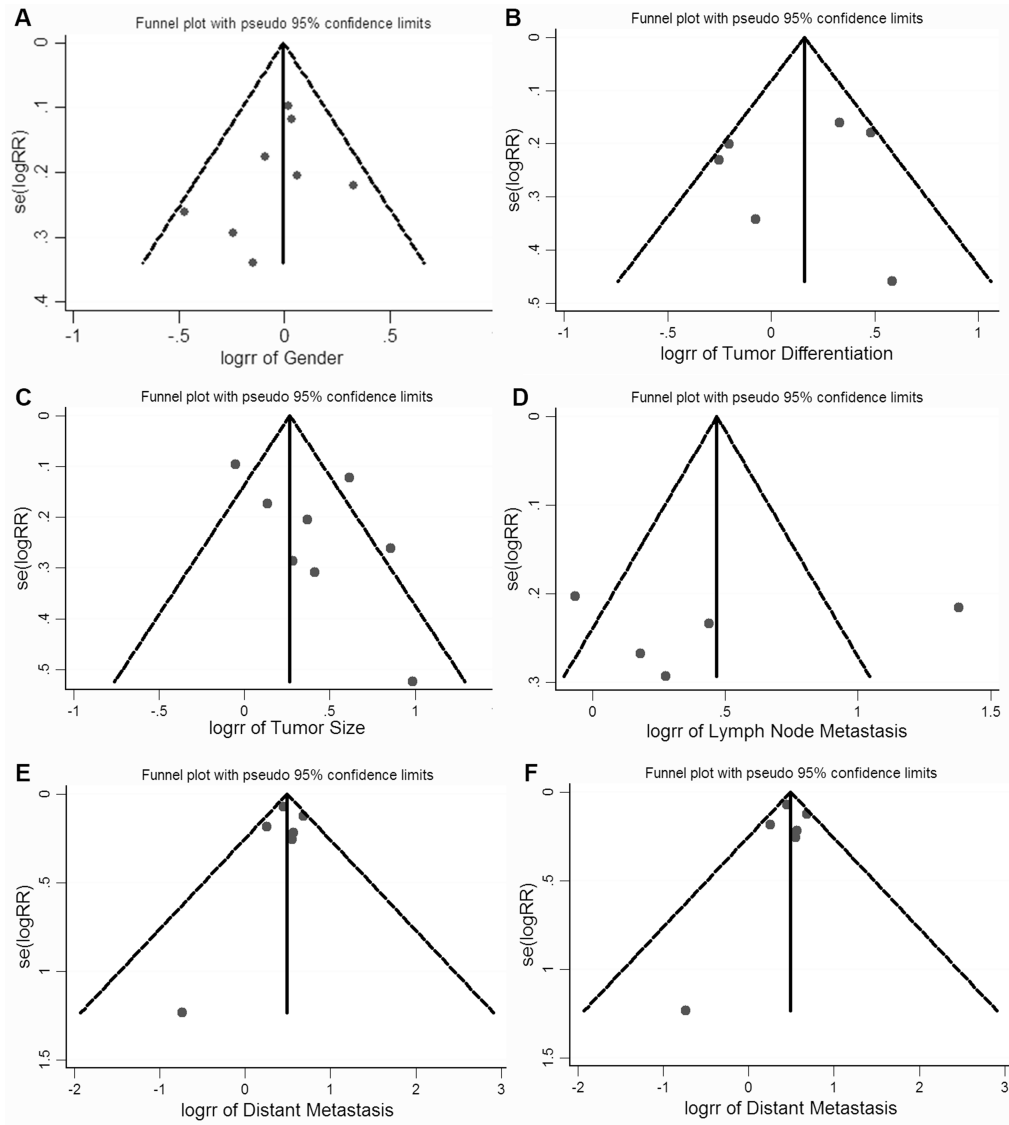

**Supplementary Figure 2: Funnel plot for the assessment of potential publication bias regarding clinicopathological parameters in the meta-analysis.**

**Supplementary Table 1: Summarized data of clinical and pathological parameters from the eligible studies**

| First author      | Gender |    | Tumor Differentiation |    |                                    |    | Tumor Size              |    |      |    | Lymph Node Metastasis |    |     |    | Distant Metastasis |    |     |    | Clinical Stage |    |        |    |      |    |
|-------------------|--------|----|-----------------------|----|------------------------------------|----|-------------------------|----|------|----|-----------------------|----|-----|----|--------------------|----|-----|----|----------------|----|--------|----|------|----|
|                   | Male   |    | Female                |    | Poor+Moderate/<br>undifferentiated |    | Well/<br>differentiated |    | T3-4 |    | T1-2                  |    | Yes |    | No                 |    | Yes |    | No             |    | III-IV |    | I-II |    |
|                   | -      | +  | -                     | +  | -                                  | +  | -                       | +  | -    | +  | -                     | +  | -   | +  | -                  | +  | -   | +  | -              | +  | -      | +  | -    |    |
| SOX9              | -      | +  | -                     | +  | -                                  | +  | -                       | +  | -    | +  | -                     | +  | -   | +  | -                  | +  | -   | +  | -              | +  | -      | +  | -    |    |
| Qi J [14]         | 34     | 27 | 22                    | 14 | NR                                 | NR | NR                      | NR | 22   | 13 | 34                    | 28 | NR  | NR | NR                 | NR | 41  | 18 | 15             | 23 | 22     | 30 | 34   | 11 |
| Yang Z [19]       | 59     | 61 | 4                     | 3  | 49                                 | 54 | 14                      | 10 | 60   | 52 | 3                     | 12 | 49  | 39 | 14                 | 25 | 18  | 12 | 45             | 52 | 61     | 55 | 2    | 9  |
| Hong Y [9]        | 62     | 54 | 15                    | 24 | 51                                 | 34 | 26                      | 44 | 65   | 43 | 12                    | 35 | 59  | 11 | 18                 | 67 | 7   | 0  | 70             | 78 | 56     | 7  | 21   | 71 |
| Matsushima H [39] | 12     | 14 | 10                    | 7  | 17                                 | 16 | 5                       | 4  | 13   | 8  | 9                     | 13 | 8   | 5  | 14                 | 16 | 0   | 1  | 22             | 20 | 13     | 9  | 9    | 12 |
| Xia S [32]        | 19     | 40 | 15                    | 14 | 30                                 | 41 | 4                       | 13 | 22   | 29 | 12                    | 25 | 17  | 23 | 17                 | 31 | 12  | 9  | 22             | 45 | 23     | 35 | 11   | 29 |
| Zhu H [16]        | 70     | 26 | 50                    | 20 | NR                                 | NR | NR                      | NR | 62   | 26 | 58                    | 20 | NR  | NR | NR                 | NR | 42  | 0  | 78             | 46 | 88     | 10 | 32   | 36 |
| Guo X [38]        | 73     | 23 | 25                    | 9  | 80                                 | 19 | 18                      | 13 | 65   | 2  | 33                    | 30 | NR  | NR | NR                 | NR | NR  | NR | NR             | NR | NR     | NR | NR   | NR |
| Lü B [18]         | 36     | 67 | 28                    | 57 | 18                                 | 45 | 46                      | 79 | 22   | 28 | 42                    | 96 | 32  | 65 | 32                 | 59 | NR  | NR | NR             | NR | 30     | 56 | 33   | 64 |

NR: Not Reported
